# Supplementary material
Source: PubMed Central journal article supplement (PMC8791782)
Supplement: NIHMS1768481-supplement-Supplementary_material.pdf [file NIHMS1768481-supplement-Supplementary_material.pdf]

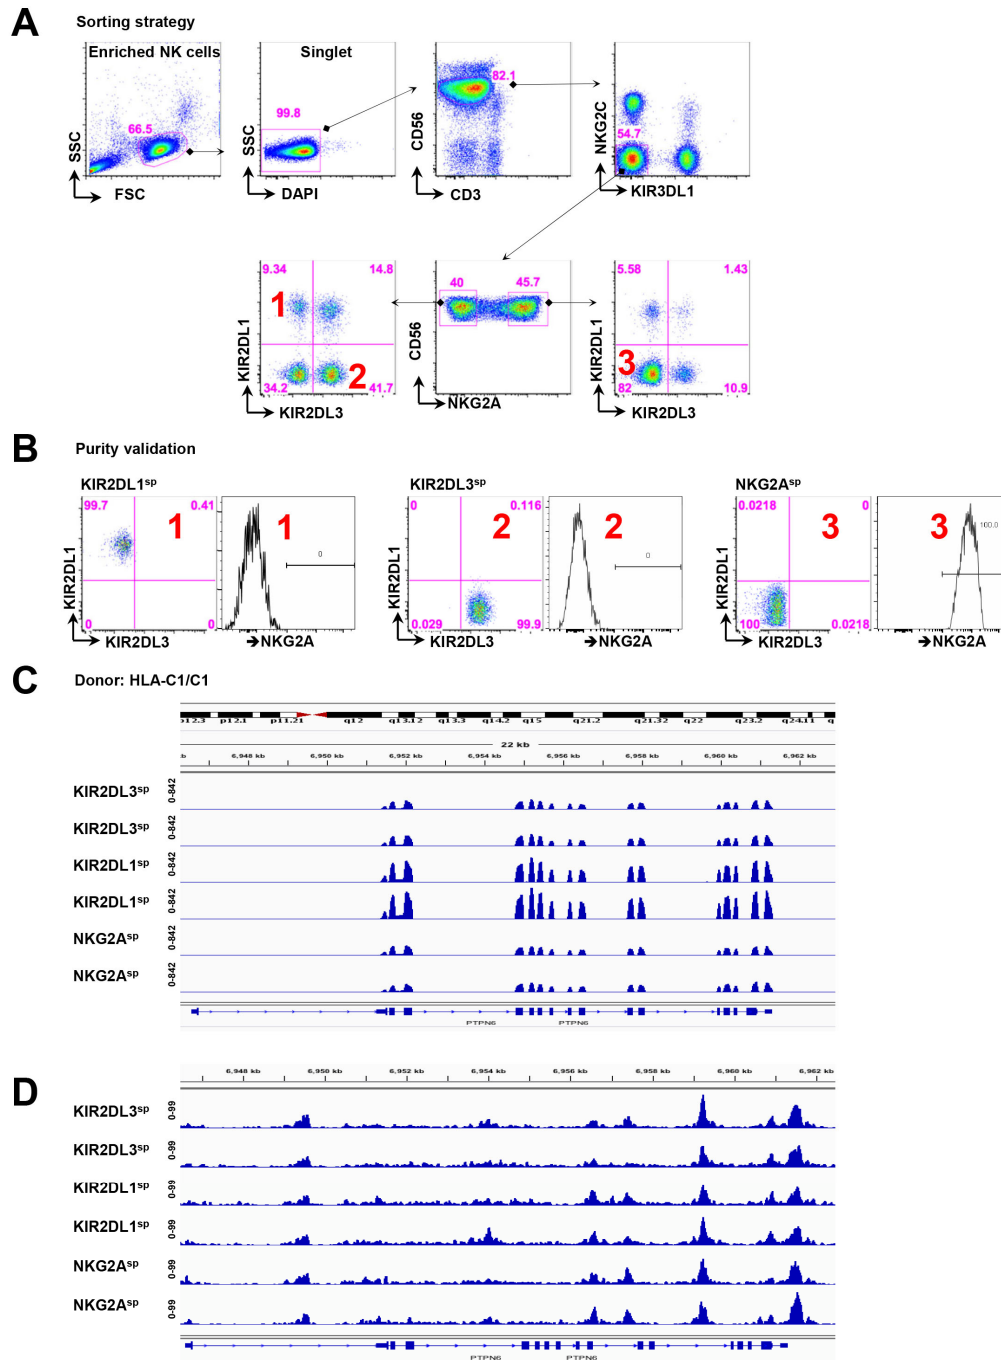

**Fig. S1. Sorting strategy of human NK cell subsets.** (A) NK cells were enriched from freshly isolated PBMCs by negative selection. CD3<sup>+</sup>CD56<sup>dim</sup> NK cells were sorted from live cells. The NKG2C<sup>+</sup> and KIR3DL1<sup>+</sup> NK cells were excluded. KIR2DL1<sup>sp</sup>, KIR2DL3<sup>sp</sup>, and NKG2A<sup>sp</sup> NK cells were sorted. (B) Purity validation of the indicated sorted NK cell subsets. (C) Genomic tracks of mapped RNA-seq reads at the *PTPN6* loci from the sorted populations. Technical duplicates are indicated. KIR2DL3 vs. KIR2DL1:  $P = 0.01$ ; NKG2A vs. KIR2DL1:  $P = 0.006$ . (D) Genomic tracks of mapped ATAC-seq reads at the *PTPN6* loci from sorted NK cell populations. Technical duplicates are indicated. KIR2DL3 vs. KIR2DL1:  $P = 0.92$ ; NKG2A vs. KIR2DL1:  $P = 0.17$ .

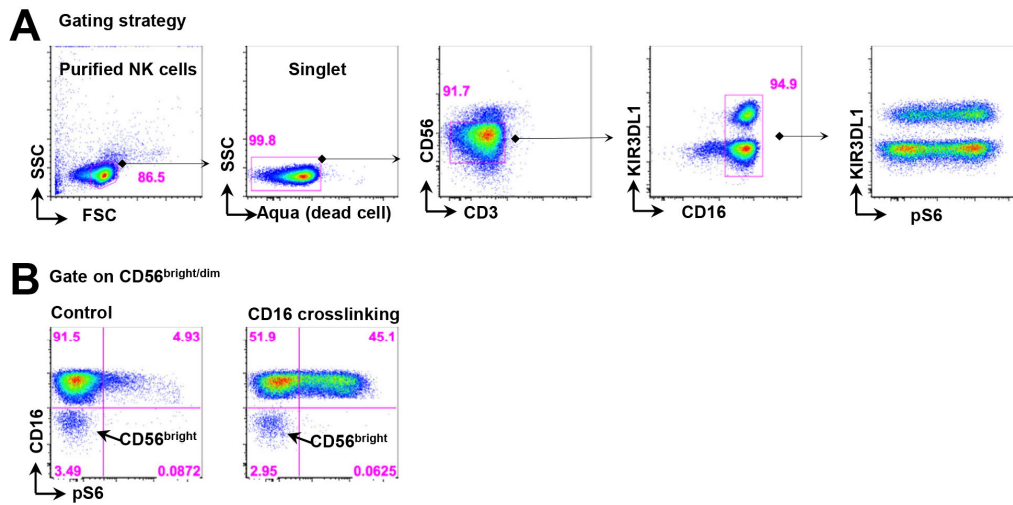

**Fig. S2. Analysis strategy of anti-CD16 antibody crosslinking.** (A) Freshly purified NK cells were labeled with Live-Dead Aqua and stimulated with biotinylated anti-CD16 and avidin for 5 min. Cells were then fixed and stained for CD3, CD56, KIR3DL1, and CD16. CD16-positive NK cells were gated to evaluate the percentage that were positive for pS6. (B) Purified NK cells stimulated with anti-IgG1 or crosslinking anti-CD16 antibody. The relative percentages of pS6-positive cells among CD16-positive and CD16-negative NK cells are shown. Plots are representative at least of five independent experiments.

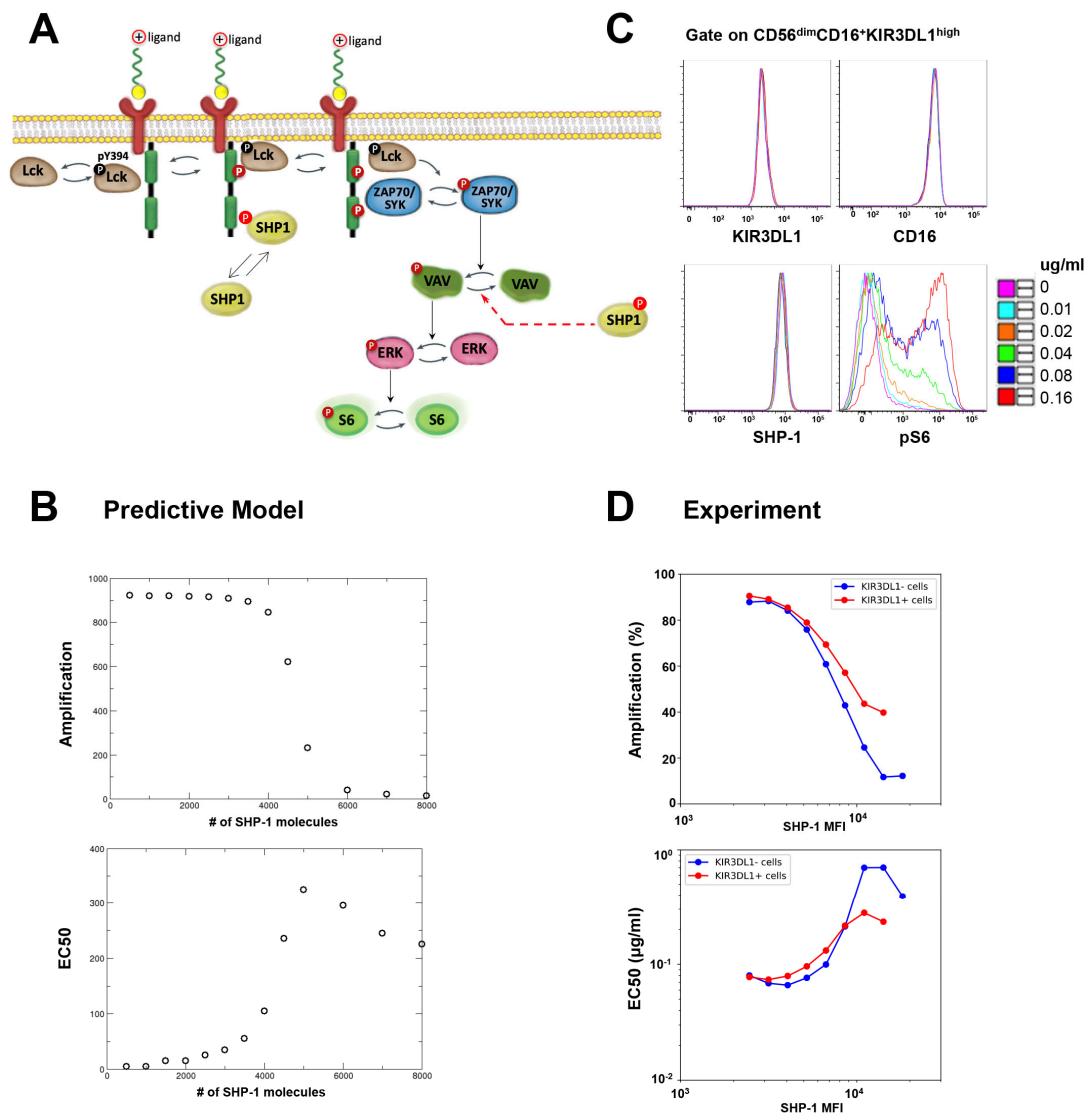

**Fig. S3. Computational simulation of NK cell activation.** (A) The signaling network used in the model. Fully activated activating receptors recruit Zap70 and Syk molecules, and receptor-bound Zap70 and Syk become phosphorylated by the action of Src family kinases (represented by Lck). Vav molecules are activated by phosphorylated Zap70 and Syk, and ERK molecules are activated by phosphorylated Vav in a coarse-grained, single-reaction step. Activated molecules are indicated by small circles with a symbol P. SHP-1 is recruited to the activating NK cell receptor signaling complex by the partially and fully phosphorylated ITAMs of the activating NK cell receptors. The ITAM-bound SHP-1 dephosphorylates pVav. (B)  $EC_{50}$  values and amplification of S6 phosphorylation upon varying the number of SHP-1 molecules in the simulation. (C) Analysis of KIR3DL1, CD16, SHP-1, and pS6 among  $CD56^{dim}$  NK cells after incubation with the indicated amounts of crosslinking anti-CD16 antibodies. (D) Amplification and  $EC_{50}$  values of  $KIR3DL1^+$  and  $KIR3DL1^-$  NK cells after incubation with crosslinking anti-CD16 antibodies. Data are representative of two independent experiments.

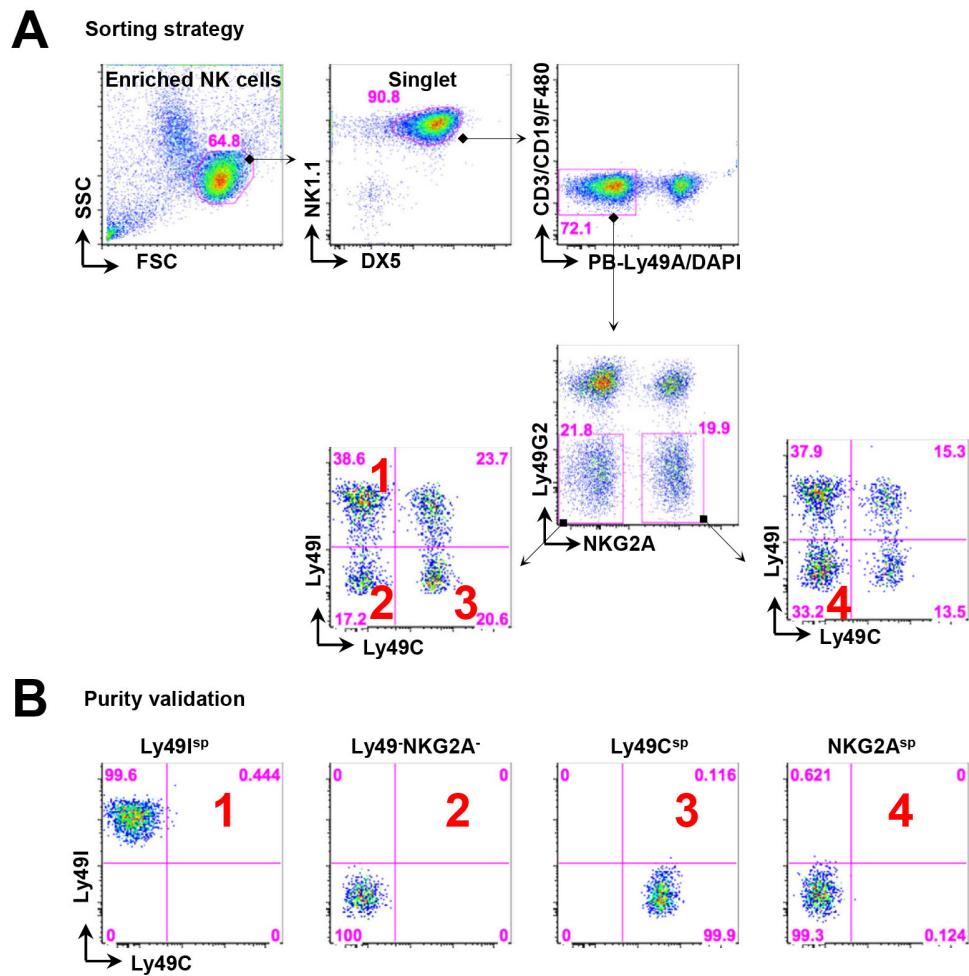

**Fig. S4. Sorting strategy of NK cell subsets from B6 mice.** (A) NK cells were enriched by negative selection from freshly prepared splenocytes. NK1.1<sup>+</sup>DX5<sup>+</sup>CD3<sup>-</sup>CD19<sup>-</sup>F480<sup>-</sup> NK cells were sorted from live cells. The Ly49A<sup>-</sup> and Ly49G2<sup>-</sup> positive NK cells were excluded. Ly49I<sup>sp</sup>, Ly49C<sup>sp</sup>, and NKG2A<sup>sp</sup> NK cells were sorted, as numerically labeled. (B) Purity validation of the indicated sorted NK cell subsets.

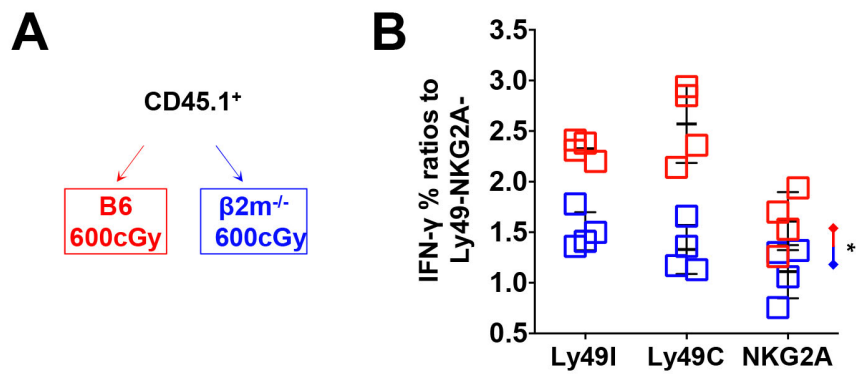

**Fig. S5. NK cells reset responsiveness among distinct MHC-I environments.** (A) CD45.1<sup>+</sup> splenocytes were transferred to irradiated B6 or  $\beta 2m^{-/-}$  recipient mice. (B) Analysis of the percentage of IFN- $\gamma$ -positive cells among the transferred CD45.1<sup>+</sup> NK cell subsets after stimulation with anti-NK1.1 antibody. Data in (B) are means  $\pm$  SD; n = 8 mice. \* $P$  < 0.05; \*\* $P$  < 0.01; \*\*\* $P$  < 0.001; Friedman test and post hoc pairwise Wilcoxon test for multi-group comparison were used. Each symbol represents an individual mouse.

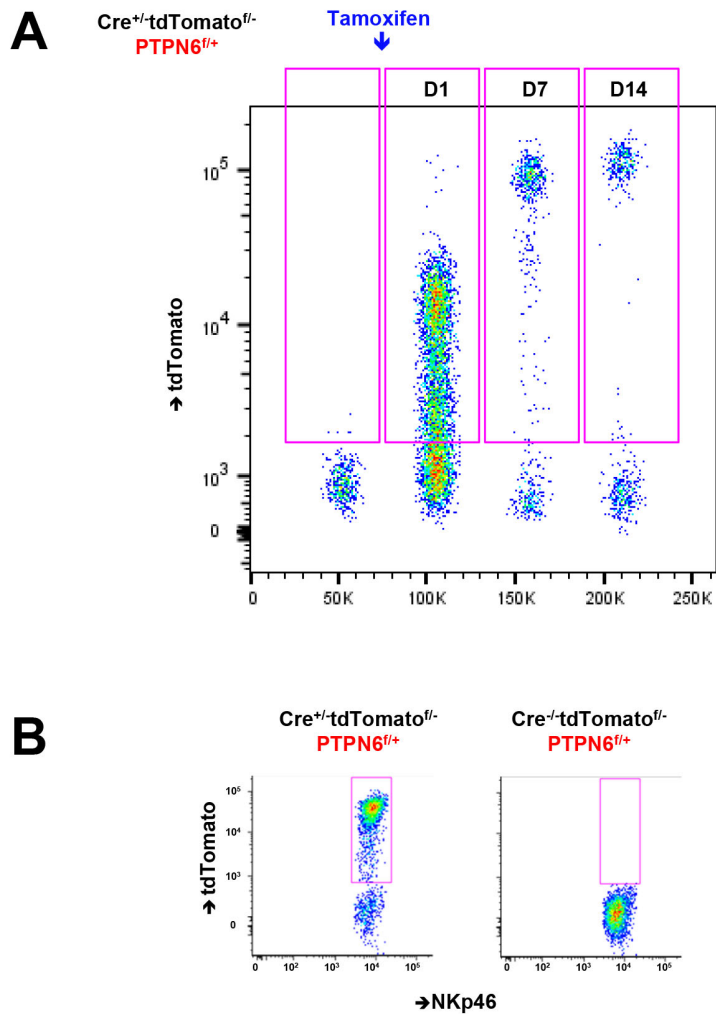

**Fig. S6. TdTomato expression in NK cells after tamoxifen administration.** (A) TdTomato expression among NKp46<sup>+</sup> NK cells from  $CreERT2^{+/+}Ptpn6^{fl/+}tdtomato^{fl/-}$  mice before and after tamoxifen administration. TdTomato expression profiles were concatenated into a single flow cytometry plot. Results are representative of two independent experiments. (B) TdTomato expression among NKp46<sup>+</sup> splenic NK cells from  $CreERT2^{+/+}Ptpn6^{fl/+}tdtomato^{fl/-}$  and  $CreERT2^{-/-}Ptpn6^{fl/+}tdtomato^{fl/-}$  mice 3 days after tamoxifen administration. Data are representative of at least three independent experiments.

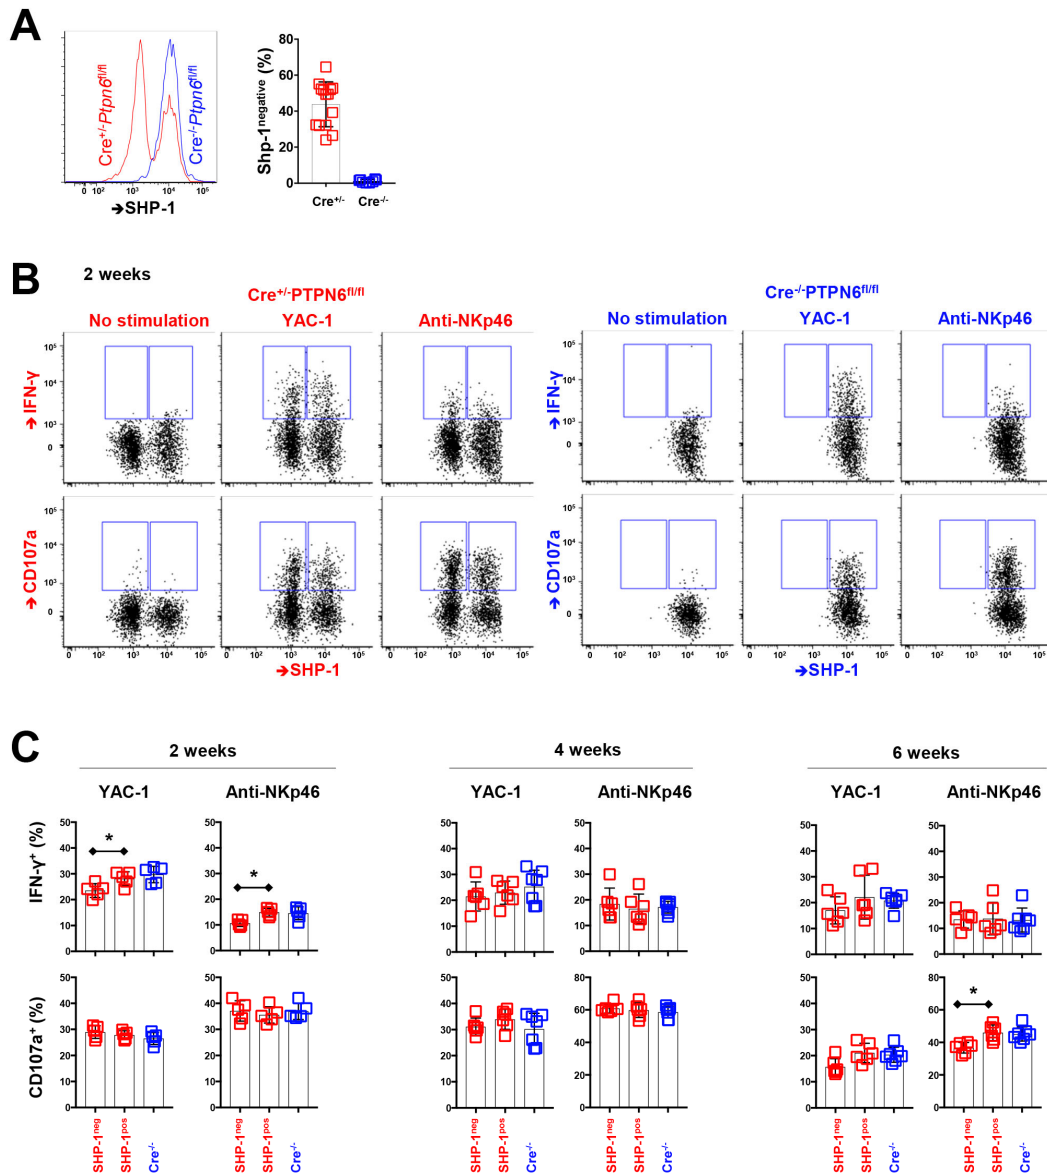

**Fig. S7. Activity of SHP-1-negative NK cells.** (A) SHP-1 expression among splenic NK cells from *CreERT2<sup>+/+</sup>Ptpn6<sup>fl/fl</sup>* and *CreERT2<sup>-/-</sup>Ptpn6<sup>fl/fl</sup>* mice 14 days after tamoxifen administration. (B) Representative plots demonstrating the frequency of IFN- $\gamma$  production and CD107a mobilization among SHP-1<sup>+</sup> and SHP-1<sup>-</sup> NK cells after co-culture with YAC-1 cells or incubation with crosslinking anti-NKp46 antibodies at 2 weeks after the administration of tamoxifen to *CreERT2<sup>+/+</sup>Ptpn6<sup>fl/fl</sup>* mice (red) and *CreERT2<sup>-/-</sup>Ptpn6<sup>fl/fl</sup>* littermate control mice (blue). (C) Analysis of IFN- $\gamma$  production and CD107a mobilization in SHP-1<sup>+</sup> and SHP-1<sup>-</sup> NK cells at 2, 4, and 6 weeks after the administration of tamoxifen to *CreERT2<sup>+/+</sup>Ptpn6<sup>fl/fl</sup>* mice (red) and *CreERT2<sup>-/-</sup>Ptpn6<sup>fl/fl</sup>* littermate control mice (blue). Results are pooled from two independent experiments. Data in (C) are means  $\pm$  SD; n = 6 mice for each time point. \**P* < 0.05; \*\**P* < 0.01; \*\*\**P* < 0.001; Friedman test and post hoc pairwise Wilcoxon test for multi-group comparison were used. Each symbol represents an individual mouse.

Sorted as DAPI<sup>-</sup>CD3<sup>-</sup>CD19<sup>-</sup>NKp46<sup>+</sup>NK1.1<sup>+</sup>CD45.1<sup>-</sup>CD45.2<sup>+</sup>

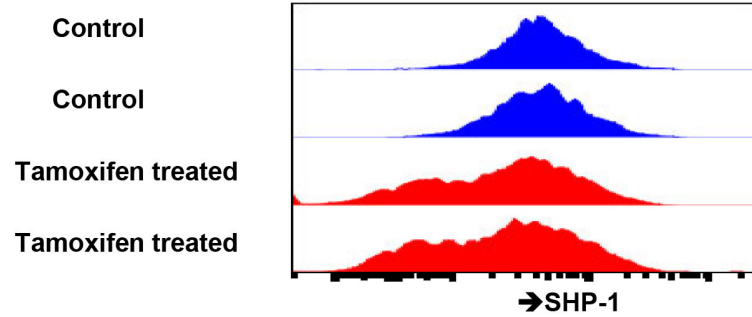

**Fig. S8. SHP-1 expression among NK cells from chimeric animals.** Mixed bone marrow chimeric mice were established as described in Fig. 5B. SHP-1 expression was evaluated among splenic CD45.1<sup>-</sup>CD45.2<sup>+</sup> NK cells from chimeric animals that did or did not receive tamoxifen for 2 weeks. NK cells were sorted as DAPI<sup>-</sup>CD3<sup>-</sup>CD19<sup>-</sup>NKp46<sup>+</sup>NK1.1<sup>+</sup>CD45.1<sup>-</sup>CD45.2<sup>+</sup> for RNA-seq analysis. Only one sorting experiment was performed to prepare samples for RNA-seq. Two biological replicates were analyzed for each condition.



**Table S1. Antibodies used in this study.**

| <b>Antigen</b>                         | <b>Antibody clone</b> | <b>Source</b>          |
|----------------------------------------|-----------------------|------------------------|
| CD3 epsilon                            | UCHT1                 | BD Bioscience          |
| CD107a                                 | H4A3                  | BD Bioscience          |
| KIR3DL1                                | DX9                   | BD Bioscience          |
| CD16                                   | 3G8                   | BD Bioscience          |
| CD122                                  | Mik- $\beta$ 3        | BD Bioscience          |
| CD45                                   | 2D1                   | BD Bioscience          |
| CD56                                   | NKH-1                 | Beckman Coulter        |
| KIR2DL2/L3/S2                          | GL183                 | Beckman Coulter        |
| NKG2A                                  | Z199                  | Beckman Coulter        |
| KIR2DL1/S1                             | EB6                   | Miltenyi               |
| NKG2A                                  | REA110                | Miltenyi               |
| NKG2C                                  | REA205                | Miltenyi               |
| KIR2DL1                                | REA284                | Miltenyi               |
| KIR2DL3                                | REA147                | Miltenyi               |
| NKG2C                                  | 134591                | R&D Systems            |
| KIR2DL1                                | 143211                | R&D Systems            |
| KIR2DL3                                | 180701                | R&D Systems            |
| SHP-1                                  | Y476                  | Abcam                  |
| SHP-1                                  | C-19 (Polyclonal)     | Santa Cruz             |
| pS6                                    | D57.2.2E              | Cell signaling         |
| Donkey anti-rat IgG (H+L)              | Polyclonal            | Jackson Immunoresearch |
| Fab fragment Goat anti-mouse IgG (H+L) | Polyclonal            | Jackson Immunoresearch |
| CD16/32                                | 2.4G2                 | BD Bioscience          |
| NKG2A/C/E                              | 20d5                  | BD Bioscience          |
| Ly49I                                  | YLI-90                | Miltenyi               |
| Ki67                                   | REA183                | Miltenyi               |
| Ly49G2                                 | 4D11                  | Thermo Fisher          |
| NK1.1                                  | PK136                 | Biolegend              |
| CD49b                                  | DX5                   | Biolegend              |
| CD3                                    | 145-2C11              | Biolegend              |
| CD19                                   | 6D5                   | Biolegend              |
| F4/80                                  | BM8                   | Biolegend              |
| CD45.1                                 | A20                   | Biolegend              |
| CD45.2                                 | 104                   | Biolegend              |
| Ly49A                                  | YE-1                  | Biolegend              |

|               |         |                                                                                  |
|---------------|---------|----------------------------------------------------------------------------------|
| IFN- $\gamma$ | XMG1.2  | Biolegend                                                                        |
| CD27          | LG.3A10 | Biolegend                                                                        |
| CD11b         | M1/70   | Biolegend                                                                        |
| CD107a        | 1D4B    | Biolegend                                                                        |
| NKp46         | 29A1.4  | Biolegend                                                                        |
| CD8a          | 2.43    | InVivoMab                                                                        |
| CD4           | GK1.5   | InVivoMab                                                                        |
| CD19          | 1D3     | InVivoMab                                                                        |
| Ter-119       | TER-119 | InVivoMab                                                                        |
| Ly49C         | 4LO3311 | Drs. S. Lemieux and W. Yokoyama<br>(Washington University School of<br>Medicine) |
